# Supplementary material for: Iridium single-atoms anchored on a TiO2 support as an efficient catalyst for the hydrogen evolution reaction
Source: Royal Society of Chemistry journal article supplement (doi:10.1039/d4cp01878h), 2024-01-01
Supplement: d4cp01878h1.pdf [file d4cp01878h1.pdf]

Supporting Information

**Iridium single-atom anchored on TiO<sub>2</sub> support as an efficient catalyst for the hydrogen evolution reaction**

Wen xuan Li<sup>a</sup>, Dashu Yin<sup>a</sup>, Peng Li<sup>a</sup>, Xinhua Zhao<sup>a\*</sup>, Shengcai Hao<sup>b, c\*</sup>

*<sup>a</sup>College of Electrical Engineering, Chuzhou Polytechnic, Chuzhou 239000, China*

*<sup>b</sup>Beijing Academy of Science and Technology, Beijing 100089, China*

*<sup>c</sup>College of Materials Science and Engineering, Beijing Jiaotong University, Beijing 100044, China*

Corresponding authors: Prof. Xinhua Zhao and Prof. Shengcai Hao

*\*E-mail: zhaoxinhua@chzc.edu.cn and hao1324@126.com*

**List of Contents**

- 1 Figure

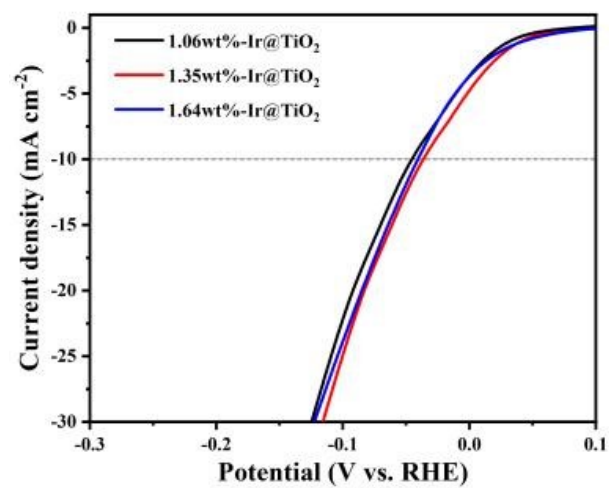

**Figure S1** HER performance of Ir@TiO<sub>2</sub> with different amount of Ir (1.06wt%, 1.35wt% and 1.64 wt%) in 0.5 M H<sub>2</sub>SO<sub>4</sub>.
